# Supplementary material for: Generation of mucin gel particles with self-degradable and -releasable properties
Source: Royal Society of Chemistry journal article supplement (doi:10.1039/c7tb02663c), 2018-01-01
Supplement: c7tb02663c1.pdf [file c7tb02663c1.pdf]

-Supporting information-

***Generation of mucin gel particles with self-degradable and -  
releasable properties***

Yuuka Fukui, Megumi Fukuda and Keiji Fujimoto

Center for Chemical Biology, School of Fundamental Science and Technology,  
Graduate School of Science and Technology, Keio University, 3-14-1 Hiyoshi, Kohoku-  
ku, Yokohama, 223-8522, Japan

E-mail: [fujimoto@applc.keio.ac.jp](mailto:fujimoto@applc.keio.ac.jp)

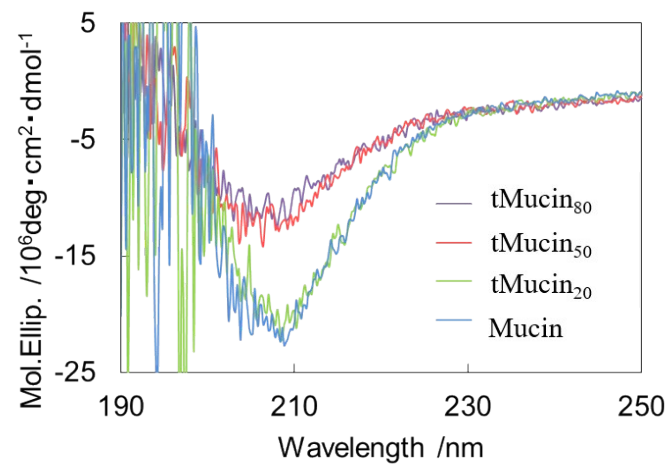

**Fig. S1** CD spectra of aqueous solutions of native mucin and trimmed mucin (tMucin<sub>20</sub>, tMucin<sub>50</sub> and tMucin<sub>80</sub>).

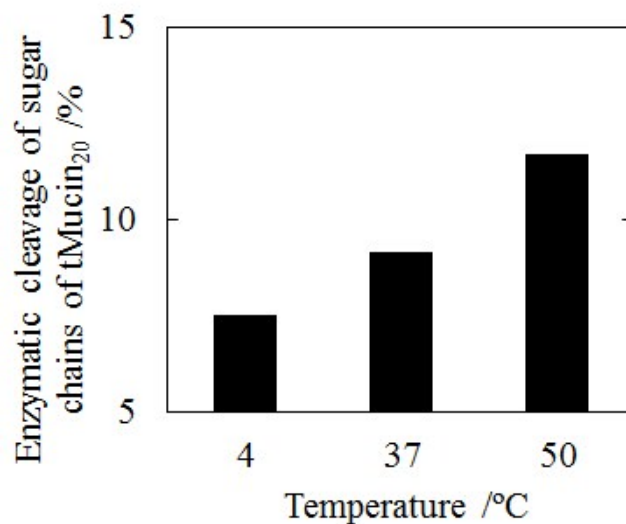

**Fig. S2** Temperature-dependent enzymatic degradation of tMucin<sub>20</sub> by lysozyme in 10 mM CaCl<sub>2</sub> aqueous solution at pH 6.0 for 2 days. The percentage of degradation was estimated by the amount of sugar chains released from tMucin<sub>20</sub> upon enzymatic cleavage according to the procedure described as follows.

At first, 0.55 mL of 6000 ppm lysozyme in 10 mM CaCl<sub>2</sub> aqueous solution was added to 11 mL of 4000 ppm mucins in 10 mM CaCl<sub>2</sub> aqueous solution. Then, it was incubated for 2 days at 4 °C, 37 °C or 50 °C to allow for enzymatic cleavage of sugar chains. Then, the sample was dialyzed against milli-Q water to isolate cleaved sugar chains from the mucin solution. The amount of cleaved sugar chains was estimated by measuring their sialic acid contents by using a resorcinol method in the same manner as described in 2.2 Trimming of mucin of the experimental section.

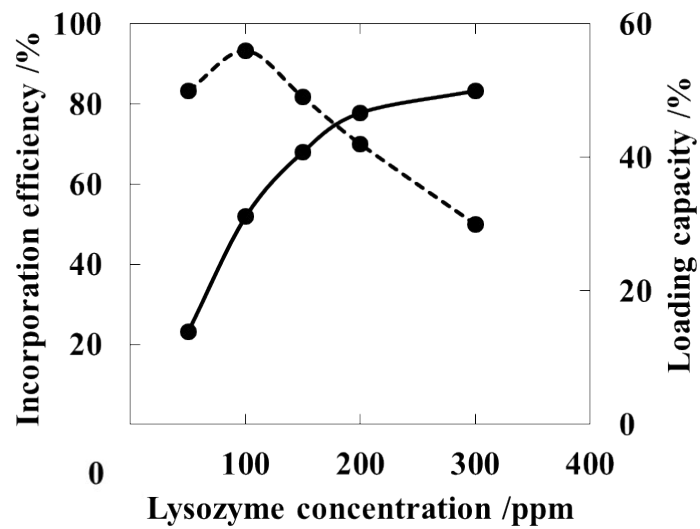

**Fig. S3** Incorporation efficiency (broken line) and loading capacity (solid line) of lysozyme in tMucin<sub>20</sub> particles at different feed concentrations.

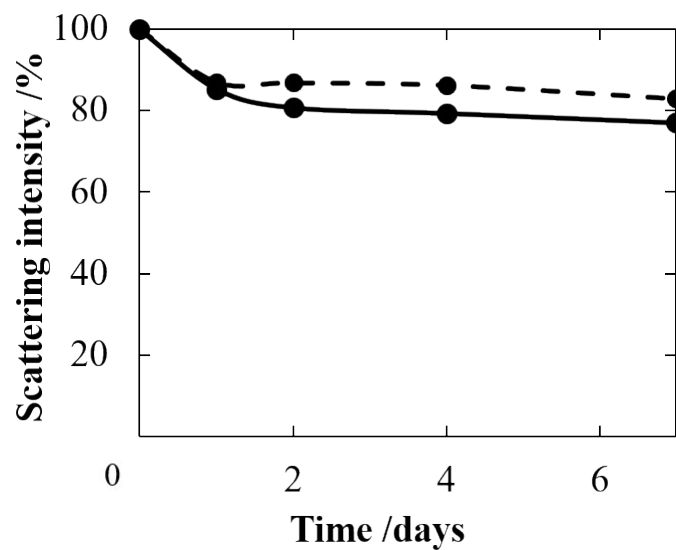

**Fig. S4** Time courses of the scattering intensity of tMucin<sub>20</sub> particles suspended in 10 mM NaCl aqueous solution (broken line) and 10 mM CaCl<sub>2</sub> aqueous solution (solid line) at 50°C.

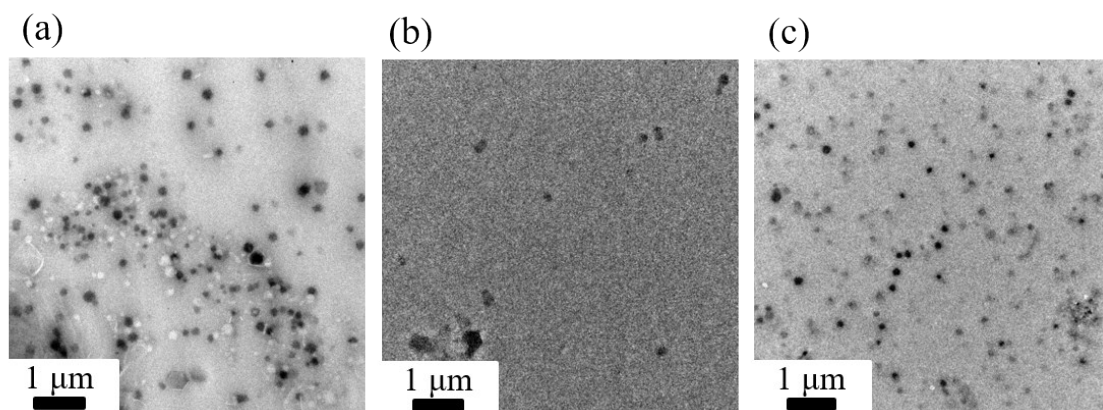

**Fig. S5** TEM images of lysozyme-incorporated tMucin<sub>20</sub> particles before (a) and after (b) 7 days-incubation at 50°C in 10 mM CaCl<sub>2</sub> aqueous solution. TEM images of tMucin<sub>20</sub> particles without lysozyme after 7 days-incubation at 50°C in 10 mM CaCl<sub>2</sub> aqueous solution (c).
